# Supplementary material for: Spatio-temporal regulation of circular RNA expression during porcine embryonic brain development
Source: PubMed Central journal article supplement (PMC4635978; doi:10.1186/s13059-015-0801-3), 2015-11-05
Supplement: 13059_2015_801_MOESM5_ESM.pdf [file 13059_2015_801_MOESM5_ESM.pdf]

## Cortex

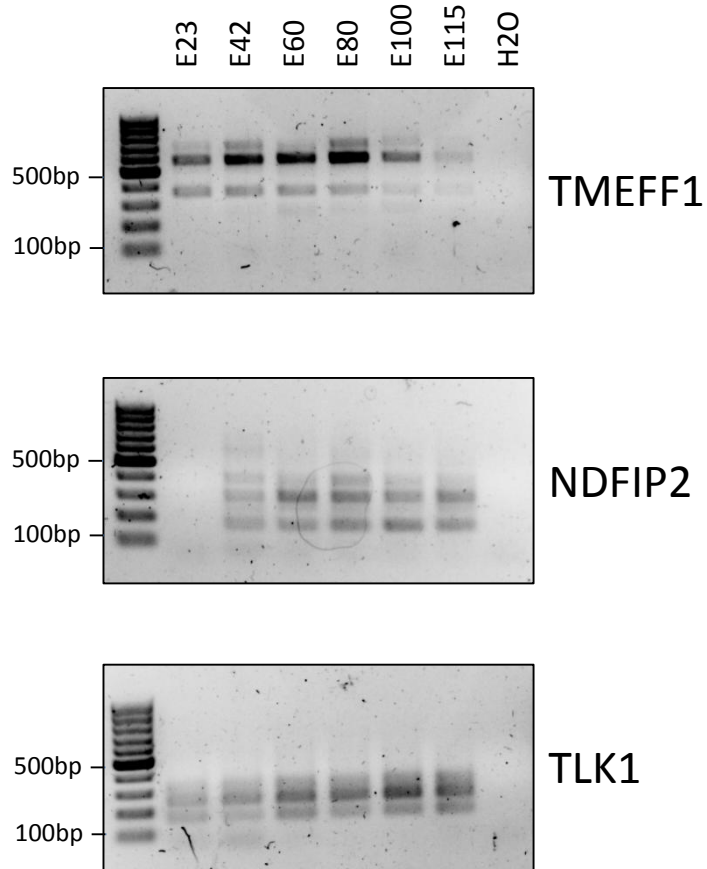

Expected/Predicted circRNA sizes from RNA-seq (Font size reflects isoform abundance based on RPM values):

703 bp  
**579 bp**  
364 bp  
267 bp

586 bp  
519 bp  
394 bp  
**300 bp**  
**166 bp**

1097 bp  
1030 bp  
593 bp  
337 bp (uses unannotated exon)  
**267 bp**  
**191 bp**
